# Supplementary material for: Combinations of Radiotherapy with Vaccination and Immune Checkpoint Inhibition Differently Affect Primary and Abscopal Tumor Growth and the Tumor Microenvironment
Source: PubMed Central journal article supplement (PMC7916259; doi:10.3390/cancers13040714), 2021-02-09
Supplement: cancers-13-00714-s001.pdf [file cancers-13-00714-s001.pdf]

## Supplementary Materials:

# Combinations of Radiotherapy with Vaccination and Immune Checkpoint Inhibition Differently Affect Primary and Abscopal Tumor Growth and the Tumor Microenvironment

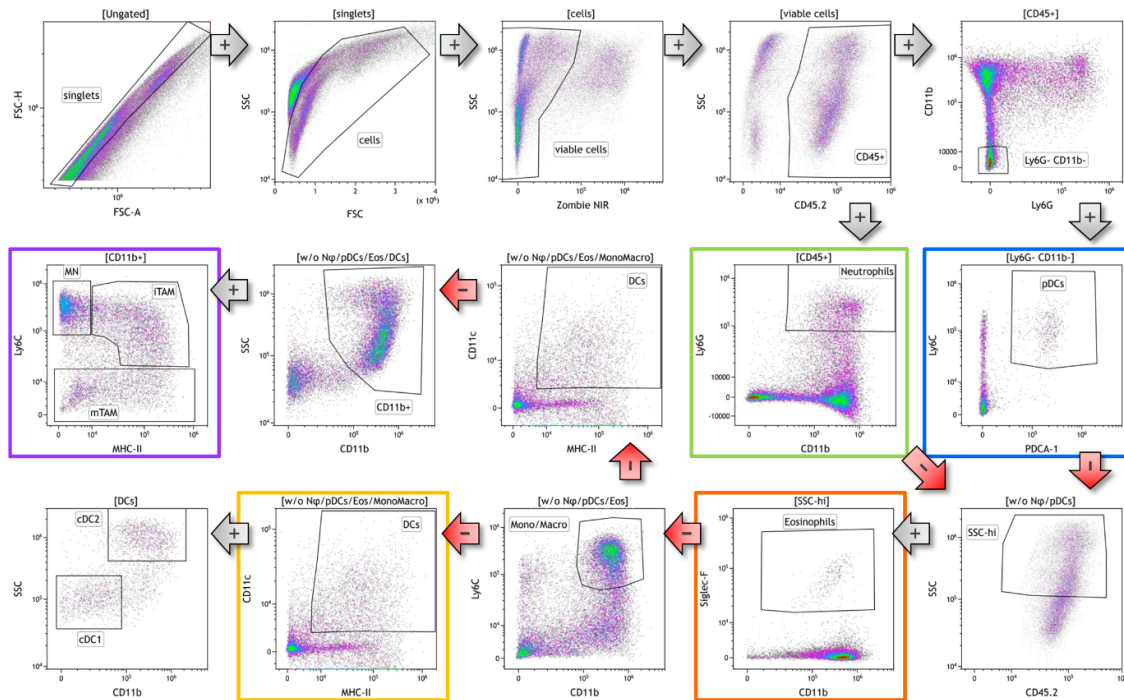

**Figure S1.** Gating strategy of the immune phenotyping panel 1. After pre-gating on single (FSC-A/FSC-H) viable cells (FSC/SSC, Zombie) all immune cells were gated as CD45<sup>+</sup>. Ly6G<sup>-</sup>, CD11b<sup>-</sup> plasmacytoid dendritic cells (pDCs) were identified as Ly6C<sup>+</sup>, PDCA-1<sup>+</sup>. Neutrophils were gated as CD11b<sup>+</sup>, Ly6G<sup>+</sup>, Eosinophils as SSC<sup>hi</sup>, CD11b<sup>+</sup>, Siglec-F<sup>+</sup>, DCs as MHC-II<sup>+</sup>, CD11c<sup>+</sup> and subdivided in conventional type 1 DCs (cDC1s; CD11b<sup>+</sup>, SSC<sup>lo</sup>) and cDC2s (CD11b<sup>+</sup>, SSC<sup>hi</sup>). After pre-gating on CD11b<sup>+</sup> cells Monocytes (MN) were identified as MHC-II<sup>+</sup>, Ly6C<sup>+</sup>, immature tumor associated macrophages (iTAM) as MHC-II<sup>+</sup>, Ly6C<sup>+</sup> and mature TAMs (mTAM) as Ly6C<sup>-</sup>. Major subtypes are highlighted with colored frames. Grey arrows with a “+” indicate subgating of the previous population. The exclusion of the previously gated population from further analysis by Boolean gating is indicated by red arrows with a “-”.

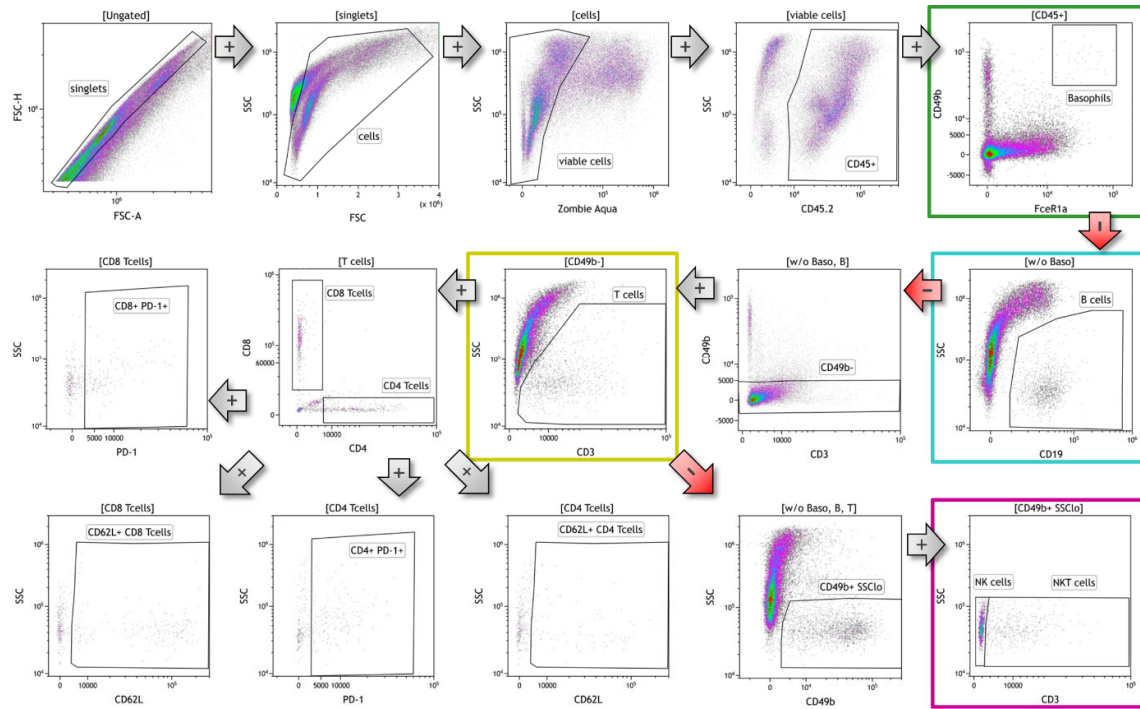

**Figure S2.** Gating strategy of the immune phenotyping panel 2. After pre-gating on single (FSC-A/FSC-H) viable cells (FSC/SSC, Zombie<sup>-</sup>) all immune cells were gated as CD45<sup>+</sup>. Basophils were identified as FcεR1α<sup>+</sup> CD49b<sup>+</sup>, B cells as CD19<sup>+</sup>, T cells as CD49b<sup>-</sup> CD3<sup>+</sup>, NK cells as CD49b<sup>+</sup> SSC<sup>lo</sup> CD3<sup>-</sup> and NKT cells as CD49b<sup>+</sup> SSC<sup>lo</sup> CD3<sup>+</sup>. T cells were further subdivided in CD4<sup>+</sup> and CD8<sup>+</sup> T cells and analyzed for PD-1 and CD62L expression. Major subtypes are highlighted with colored frames. Grey arrows with a “+” indicate subgating of the previous population. The exclusion of the previously gated population from further analysis by Boolean gating is indicated by red arrows with a “-”.

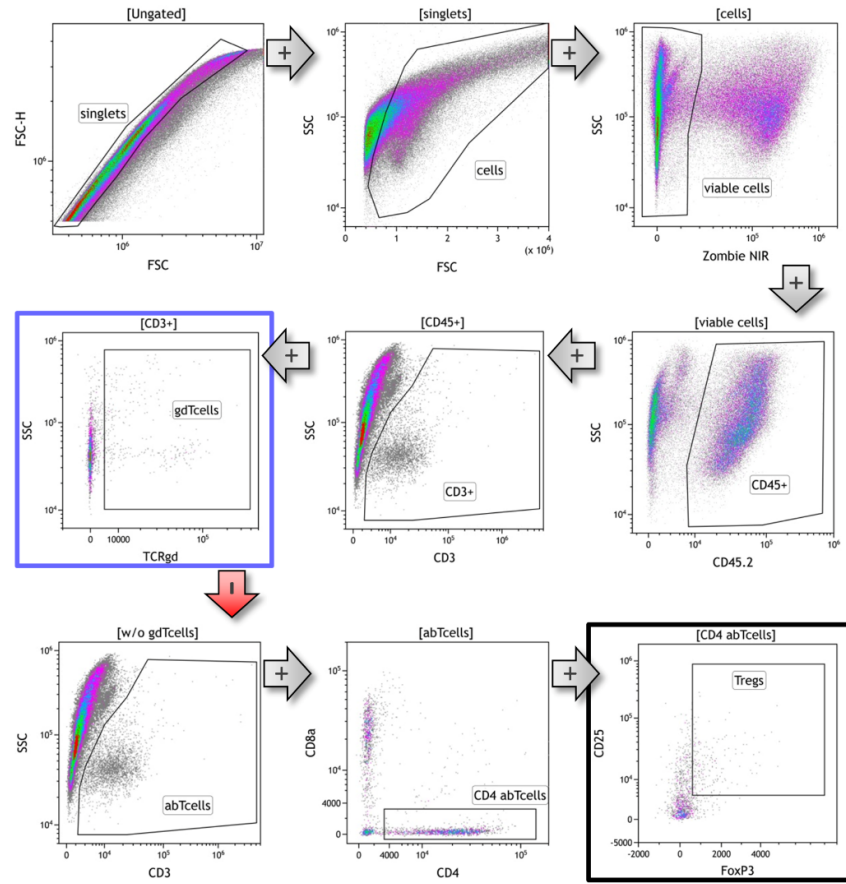

**Figure S3.** Gating strategy of the immune phenotyping panel 3. After pre-gating on single (FSC-A/FSC-H) viable cells (FSC/SSC, Zombie<sup>+</sup>) all immune cells were gated as CD45<sup>+</sup>.  $\gamma\delta$  T cells were identified as CD3<sup>+</sup> TCR $\gamma\delta$ <sup>+</sup> and Tregs as CD3<sup>+</sup> CD4<sup>+</sup> CD25<sup>+</sup> FoxP3<sup>+</sup>. Major subtypes are highlighted with colored frames. Grey arrows with a "+" indicate subgating of the previous population. The exclusion of the previously gated population from further analysis by Boolean gating is indicated by red arrows with a "-". **Antibody panels for the immune phenotyping of immune**

### cells in tumors and blood

**Table S1.** Antibodies and dyes of immune phenotyping panel 1.

| Target           | Fluorochrome | Supplier    | Catalog # |
|------------------|--------------|-------------|-----------|
| Live/dead        | Zombie NIR   | BioLegend   | mic       |
| MHC-II (I-A/I-E) | eFluor 450   | eBioscience | 48-5321   |
| Ly-6G            | PE-Cy7       | BD          | 560601    |
| Ly-6C            | FITC         | BD          | 553104    |
| CD11b            | APC          | eBioscience | 17-0112   |
| Siglec-F         | PE           | BD          | 552126    |
| CD45.2           | PerCP-Cy5.5  | eBioscience | 45-0454   |
| PDCA-1           | BV 650       | BioLegend   | 127019    |
| CD11c            | BV 510       | BD          | 562949    |

**Table S2.** Antibodies and dyes of immune phenotyping panel 2.

| Target | Fluorochrome | Supplier  | Catalog # |
|--------|--------------|-----------|-----------|
| CD62L  | PE-Cy7       | BD        | 560516    |
| CD8a   | BV 605       | BioLegend | 100744    |

|           |               |             |         |
|-----------|---------------|-------------|---------|
| FcεR1α    | PE            | BioLegend   | 134308  |
| Live/dead | Zombie Aqua   | BioLegend   | 423102  |
| CD4       | FITC          | BD          | 553729  |
| CD19      | APC-Cy7       | BD          | 561737  |
| CD3e      | V450          | BD          | 560801  |
| CD45.2    | PerCP-Cy5.5   | eBioscience | 45-0454 |
| CD49b     | APC           | BioLegend   | 108910  |
| PD-1      | PE-Dazzle 594 | BioLegend   | 109116  |

**Table S3.** Antibodies and dyes of immune phenotyping panel 3.

| Target    | Fluorochrome | Supplier        | Catalog #   |
|-----------|--------------|-----------------|-------------|
| Live/dead | Zombie NIR   | BioLegend       | 423106      |
| CD8a      | BV 605       | BioLegend       | 100744      |
| CD4       | FITC         | BD              | 553729      |
| CD3e      | V450         | BD              | 560801      |
| γδTCR     | PE           | eBioscience     | 12-5711-82  |
| CD45.2    | PerCP-Cy5.5  | eBioscience     | 45-0454     |
| CD25      | PE-Cy7       | BD              | 552880      |
| FoxP3     | APC          | Miltenyi Biotec | 130-093-013 |

## Antibody panels for the immune checkpoint ligands

**Table S4.** Antibodies and dyes of immune checkpoint panel 1.

| Table.    | Fluorochrome    | Supplier    | Catalog #  |
|-----------|-----------------|-------------|------------|
| PD-L1     | PE-Cy7          | eBioscience | 25-5982    |
| PD-L2     | APC             | BioLegend   | 107210     |
| OX40L     | PerCP-eFluor710 | eBioscience | 46-5905-80 |
| ICOS-L    | PE              | BioLegend   | 107405     |
| Live/dead | Zombie Aqua     | BioLegend   | 423102     |

**Table S5.** Antibodies and dyes of immune checkpoint panel 2.

| Target     | Fluorochrome   | Supplier        | Catalog #   |
|------------|----------------|-----------------|-------------|
| 4-1BBL     | VioBright-FITC | Miltenyi Biotec | 130-105-857 |
| Galectin-9 | BV421          | BD              | 566028      |
| HVEM       | APC            | BioLegend       | 136305      |
| CD70       | PE             | eBioscience     | 12-0701     |
| Live/dead  | Zombie Yellow  | BioLegend       | 423104      |

## Quantitative real-time PCR (qPCR)

**Table S6.** List of Bio-Rad Prime PCR Primers.

| Gene symbol   | Gene name                                       | Assay ID       |
|---------------|-------------------------------------------------|----------------|
| Cd274         | CD274 antigen (PD-L1)                           | qMmuCID0011907 |
| Cd70          | CD70 antigen                                    | qMmuCED0045283 |
| Cxcl1         | chemokine (C-X-C motif) ligand 1                | qMmuCED0047655 |
| E330016A19Rik | RIKEN cDNA E330016A19 gene (cGAS)               | qMmuCID0025813 |
| Hprt          | hypoxanthine guanine phosphoribosyl transferase | qMmuCED0045738 |
| Icosl         | Icos ligand                                     | qMmuCID0019198 |
| Ifnb1         | interferon beta 1                               | qMmuCED0050444 |
| Pdcd1lg2      | programmed cell death 1 ligand 2 (PD-L2)        | qMmuCID0011922 |

|          |                                                                                          |                |
|----------|------------------------------------------------------------------------------------------|----------------|
| Rps18    | ribosomal protein S18                                                                    | qMmuCED0045430 |
| Tbp      | TATA box binding protein                                                                 | qMmuCID0040542 |
| Tmem173  | transmembrane protein 173 (STING)                                                        | qMmuCED0046127 |
| Tnfrsf14 | tumor necrosis factor receptor superfamily, member 14 (herpesvirus entry mediator; HVEM) | qMmuCID0010946 |
| Tnfsf4   | Tumor necrosis factor (ligand) superfamily, member 4 (OX40L)                             | qMmuCID0005677 |
| Tnfsf9   | tumor necrosis factor (ligand) superfamily, member 9 (4-1BBL)                            | qMmuCED0004214 |
| Trex1    | three prime repair exonuclease 1                                                         | qMmuCED0061616 |
